wave developed, even though hypokalemia was present. These benign responses might have been a result of an antiarrhythmic action of lidocaine.

The results of the present study indicate that the decrease in amplitude of the T wave, development of U waves, and hypokalemia after axillary blockade with lidocaine and epinephrine were induced by epinephrine, and that these were prevented by pretreatment with propranolol. Hypokalemia can be associated with a variety of cardiac dysrhythmias. On the basis of our findings, we recommend that the ECG should be monitored during blockade, and that pretreatment with beta-adrenergic blockade may be beneficial when local anesthetics with epinephrine are given. Also, epinephrine should be avoided in patients with  $K^+$  deficiency.

The authors gratefully acknowledge the review of this paper made by Leroy D. Vandam, M.D.

#### REFERENCES

1. Bachromejew IwR: Über den Komplex: Innensekretion-Nerven-Ionen. Die Beteiligung des Schilddrüsenapparates an der Regelung der Ca- und K-Ionen. *Pflügers Arch* 231:426-441, 1932
2. D'Silva JL: The action of adrenaline on serum potassium. *J Physiol (Lond)* 82:393-398, 1934
3. Ellis S: The metabolic effects of epinephrine and related amines. *Pharmacol Rev* 8:486-562, 1956
4. Lim M, Linton RAF, Band DM: Continuous intravascular monitoring of epinephrine-induced changes in plasma potassium. *ANESTHESIOLOGY* 57:272-278, 1982
5. Cousins MJ, Bridenbaugh PO: *Neural Blockade in Clinical Anesthesia and Management of Pain*. Philadelphia, JB Lippincott, 1980, p 103
6. Winer N: Norepinephrine, epinephrine and the sympathomimetic amines, *The Pharmacological Basis of Therapeutics*. Edited by Goodman LS, Gilman A, Rall TW, Murad F. New York, Macmillan, 1985, pp 145-180
7. Struthers AD, Reid JL, Whitesmith R, Rodger JC: Effect of intravenous adrenaline on electrocardiogram, blood pressure, and serum potassium. *Br Heart J* 49:90-93, 1983
8. Vick RL, Todd EP, Luedke DW: Epinephrine-induced hypokalemia: Relation to liver and skeletal muscle. *J Pharmacol Exp Ther* 181:139-146, 1972
9. Brewer G, Larson PS, Schroeder AR: On the effect of epinephrine on blood potassium. *Am J Physiol* 126:708-712, 1939
10. Allot EN, McArdle B: Further observations on familial periodic paralysis. *Clin Sci* 3:229-239, 1937
11. Pekkarnien A, Hortling H: The effect of continuous intravenous infusion of adrenaline on the circulation and blood chemistry. *Acta Endocrinol (Copenh)* 6:193-214, 1951
12. Castleden LIM: The effect of adrenaline on the serum potassium level in man. *Clin Sci* 3:241-245, 1937
13. Keys A: The response of the plasma potassium level in man to the administration of epinephrine. *Am J Physiol* 121:325-330, 1938
14. Jacobson WE, Hammarsten JF, Heller BI: The effects of adrenaline upon renal function and electrolyte excretion. *J Clin Invest* 30:1503-1506, 1951
15. Paget M, Routier G: Sur l'hypokaliémie post-adrenalinique. *J Sci Med Lille* 81:539-549, 1963
16. Massara F, Tripodina A, Rotunno M: Propranolol block of epinephrine-induced hypokalaemia in man. *Eur J Pharmacol* 10:404-407, 1970
17. Dury A, Holler JW, Smith C: The changes in plasma potassium level after epinephrine in normal human beings and in persons with epilepsy. *J Clin Invest* 31:440-444, 1952
18. Struthers AD, Reid JL, Whitesmith R, Rodger JC: The effects of cardioselective and non-selective  $\beta$ -adrenoceptor blockade on the hypokalaemic and cardiovascular responses to adrenomedullary hormones in man. *Clin Sci* 65:143-147, 1983
19. Brown MJ, Brown DC, Murphy MB: Hypokalemia from beta<sub>2</sub>-receptor stimulation by circulating epinephrine. *N Engl J Med* 309:1414-1419, 1983

Anesthesiology  
69:112-116, 1988

### End-tidal, Transcutaneous, and Arterial $p_{CO_2}$ Measurements in Critically Ill Neonates: A Comparative Study

B. A. B. MCEVEDY, M.B., B.S., F.F.A.R.C.S.,\* M. E. McLEOD, M.D., F.R.C.P.C.,†  
M. MULERA, M.B., CH.B., F.R.C.P.C.,‡ H. KIRPALANI, M.B., M.R.C.P. (UK),§ J. LERMAN, M.D., F.R.C.P.C.†

\* Fellow in Anaesthesia.

† Assistant Professor of Anaesthesia.

‡ Fellow in Neonatology.

§ Assistant Professor of Pediatrics.

Received from the Departments of Anaesthesia and Neonatology and the Research Institute, The Hospital for Sick Children, University of Toronto, Toronto, Ontario. Accepted for publication January 20, 1988. Presented in part at the Annual Meeting of the American Society of Anesthesiologists, Atlanta, Georgia, October, 1987.

Non-invasive estimates of arterial  $CO_2$  ( $Pa_{CO_2}$ ), such as end-tidal ( $PetCO_2$ ) and transcutaneous  $CO_2$

Address reprint requests to Dr. McLeod: Department of Anaesthesia, The Hospital for Sick Children, 555 University Avenue, Toronto, Ontario, Canada M5G 1X8.

Key words: Anesthesia; pediatric. Carbon dioxide; alveolar; arterial; end-tidal; tension; transcutaneous.

(PtcCO<sub>2</sub>), are alternatives to frequent arterial sampling.<sup>1-4</sup> However, the accuracy of PetCO<sub>2</sub> measurements in neonates has been questioned.<sup>5,6</sup> Badgwell *et al.* determined the accuracy of PetCO<sub>2</sub> measurements in healthy infants ( $\leq 12$  kg in weight), and found that, with an aspirating capnometer, PetCO<sub>2</sub> is significantly more accurate when gas is sampled from the distal end of the endotracheal tube rather than the proximal end.<sup>7</sup> We speculated that distal PetCO<sub>2</sub> measurements might also improve the accuracy of end-tidal estimates of PaCO<sub>2</sub> in preterm and full-term neonates. Therefore, we compared the accuracy of PetCO<sub>2</sub> and PtcCO<sub>2</sub> measurements as estimates of PaCO<sub>2</sub> in neonates.

### MATERIALS AND METHODS

After approval from the Committee on Human Research, PetCO<sub>2</sub>, PtcCO<sub>2</sub> and PaCO<sub>2</sub> measurements were recorded in 27 tracheally intubated preterm and full-term neonates (endotracheal tube sizes 3.0 or 3.5 mm internal diameter) in the Neonatal Intensive Care Unit. All neonates were either mechanically ventilated with a pressure-limited ventilator or breathing spontaneously with continuous positive airway pressure ( $\leq 5$  cm H<sub>2</sub>O). Forty-six sets of distal PetCO<sub>2</sub>, PtcCO<sub>2</sub>, and PaCO<sub>2</sub> measurements and 36 sets of proximal and distal PetCO<sub>2</sub> measurements were recorded. Measurements were repeated in neonates when either improvement or deterioration occurred and ventilation was changed.

PetCO<sub>2</sub> was measured with a Puritan-Bennett/Datex capnometer (sampling flow rate 150 ml/min). The capnometer was calibrated with a standard gas mixture (5% CO<sub>2</sub> in air) and corrected for ambient pressure. Capnograms were recorded on a calibrated Puritan-Bennett/Datex recorder.

Distal PetCO<sub>2</sub> was measured from the distal end of the endotracheal tube through a 19-g sampling catheter that was inserted through a modified elbow in the breathing circuit. Proximal PetCO<sub>2</sub> was measured from the elbow of the circuit. The total delay time (defined as the time from a step-wise increase in CO<sub>2</sub> to a 90% rise time) of the Puritan-Bennett sampling system with a 19-g catheter was measured. Although the accuracy of the Puritan-Bennett Datex capnometer decreases when the respiratory rate exceeds 75 breaths per minute<sup>†</sup> (even at the higher sampling rate) and when severe lung disease is present, all neonates were included for comparisons with PtcCO<sub>2</sub>.

PtcCO<sub>2</sub> was measured with a Kontron Microgas® 7640 pO<sub>2</sub>/pCO<sub>2</sub> monitor c model 81 CombiSensor®. The combisensor was calibrated at 44° C with 5% and 10%

CO<sub>2</sub> using an algorithm derived from correlation studies to estimate PaCO<sub>2</sub> (as per manufacturer's instructions). The transcutaneous sensor was then applied to the anterior thorax of each neonate.

To determine the effect of the sampling catheter within the endotracheal tube on ventilation and oxygenation, PtcCO<sub>2</sub> and transcutaneous oxygen tension (PtcO<sub>2</sub>) were recorded before, and at least 15 min after, the sampling catheter was inserted to the distal end of the endotracheal tube.

After the distal PetCO<sub>2</sub> and PtcCO<sub>2</sub> measurements were stable for at least 15 min, an arterial blood sample was obtained from an indwelling arterial cannula and analyzed. The capnometer sampling catheter was then withdrawn to the level of the breathing circuit elbow to measure the proximal PetCO<sub>2</sub>. Peak inspiratory pressure, respiratory rate, and inspired fraction of oxygen (FI<sub>O<sub>2</sub></sub>) were recorded.

To compare the accuracy of these estimates of P<sub>CO<sub>2</sub></sub>, four ratios were determined: proximal to distal PetCO<sub>2</sub>, distal PetCO<sub>2</sub> (with and without the excluded patients) to PaCO<sub>2</sub>, and PtcCO<sub>2</sub> to PaCO<sub>2</sub>.

Statistical significance ( $P < 0.05$ ) was determined using paired and unpaired Student's *t* tests. Least squares linear regression analysis and the coefficient of determination ( $r^2$ ) were determined for distal PetCO<sub>2</sub> and PtcCO<sub>2</sub> versus PaCO<sub>2</sub>. The regression between distal PetCO<sub>2</sub> and PaCO<sub>2</sub> was repeated after we excluded the results from those neonates with respiratory rates greater than 70 breaths per minute or an FI<sub>O<sub>2</sub></sub> greater than 0.7 (see below).

### RESULTS

The mean ( $\pm$ SD) gestational age of the 27 neonates was  $34.0 \pm 5$  weeks. The mean ( $\pm$ SD) post-natal age and weight at the time of the study were  $3.9 \pm 5.7$  days and  $2.4 \pm 0.9$  kg, respectively. Twenty-two neonates had ventilation controlled primarily for lung disease; 18 had respiratory distress syndrome as a result of lung immaturity, ten had a history of birth asphyxia, and five had uncorrected congenital heart defects. None of the neonates was in shock. Five neonates subsequently died.

Distal and proximal PetCO<sub>2</sub> waveforms from two neonates are shown in figure 1. The distal waveforms demonstrate maximum PetCO<sub>2</sub> values that are greater than those on the proximal waveforms. Distal PetCO<sub>2</sub> measurements were significantly greater than all corresponding proximal measurements ( $P < 0.001$ ) and more closely approximated PaCO<sub>2</sub> values than did the proximal measurements ( $n = 35$ ) (fig. 2).

The coefficient of determination for the linear regression between distal PetCO<sub>2</sub> and PaCO<sub>2</sub> for the entire group of neonates was 0.39. When neonates with respi-

<sup>†</sup> Puritan-Bennett Corporation CO<sub>2</sub> monitor and recorder operating instructions.

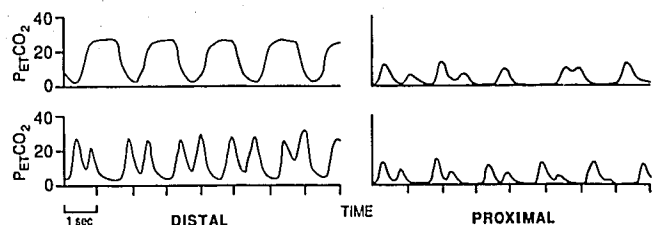

FIG. 1. Distal and proximal capnograms from two neonates. The upper recording was obtained from a neonate who was mechanically ventilated, and the lower from a neonate who was breathing spontaneously with an intermittent mandatory rate of 40/min. The differences in PetCO<sub>2</sub> between distal and proximal sites were approximately 16 mmHg for both neonates.

ratory rates > 70/min (based on the total delay time of the sampling system) or severe lung disease ( $FI_{O_2} > 0.7$ ) were excluded, the coefficient of determination increased to 0.72 (fig. 3). The mean ( $\pm$ SD) respiratory rate and  $FI_{O_2}$  were 49.2 ( $\pm$ 11.95) breaths per minute and 0.34 ( $\pm$ 0.15). Sixteen sets of measurements in 13 infants were excluded according to these criteria: nine because of respiratory rate alone, three because of  $FI_{O_2}$  alone, and four because of both criteria. The mean ( $\pm$ SD) respiratory rate in this group was 75 ( $\pm$ 13) breaths per minute, and the mean  $FI_{O_2}$  was 0.62 ( $\pm$ 0.25).

The coefficient of determination between PtcCO<sub>2</sub> and PaCO<sub>2</sub> for all neonates was 0.76 (fig. 4).

The ratio PtcCO<sub>2</sub>/PaCO<sub>2</sub> was the most accurate ratio determined ( $1.0 \pm 0.10$ ) (table 1). Both PetCO<sub>2</sub> distal/PaCO<sub>2</sub> ratios were significantly less accurate than the PtcCO<sub>2</sub>/PaCO<sub>2</sub> ( $P < 0.02$ ). Furthermore, the PetCO<sub>2</sub> distal/PaCO<sub>2</sub> ratio for all neonates was significantly less

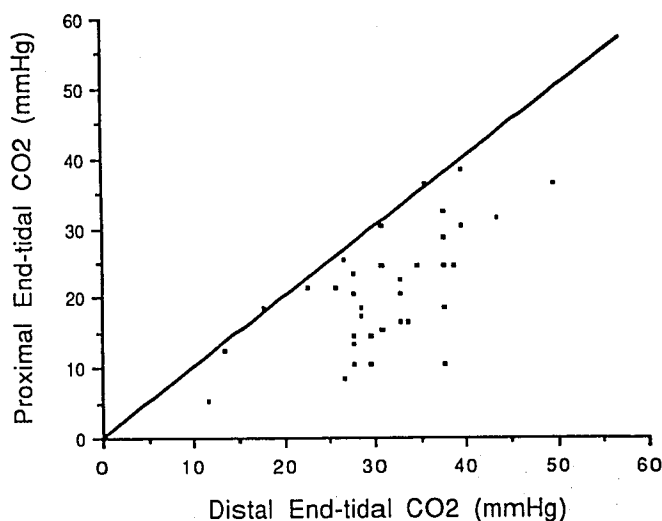

FIG. 2. Distal PetCO<sub>2</sub> measurements were consistently greater than proximal measurements ( $n = 35$ ) ( $P < 0.001$ ). The line of identity is included.

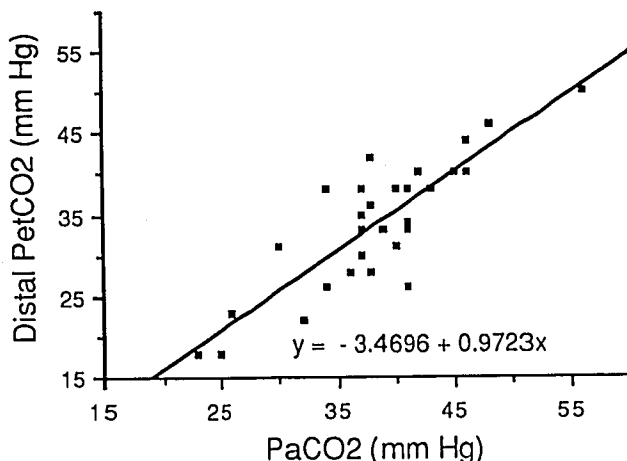

FIG. 3. Distal PetCO<sub>2</sub> accurately predicted PaCO<sub>2</sub> ( $r^2 = 0.72$ ) for neonates with mild to moderate lung disease (respiratory rate < 70/min and  $FI_{O_2} < 0.7$ ) ( $n = 30$ ).

than that for neonates with respiratory rates < 70 breaths per minute and  $FI_{O_2} < 0.7$  ( $P < 0.05$ ). The mean PetCO<sub>2</sub> proximal/distal ratio of 0.65 demonstrated the inaccuracy of proximal measurements in neonates.

Arterial to end-tidal (a-et) CO<sub>2</sub> differences were determined using distal PetCO<sub>2</sub> measurements. The range of these differences in neonates with minimal lung disease ( $FI_{O_2} < 0.3$ ), -4 to 7 mmHg, was significantly less than in neonates with moderate to severe lung disease ( $FI_{O_2} > 0.5$ ), 5–20 mmHg ( $P < 0.001$ ).

The reduction in the cross-sectional area of the endotracheal tube attributable to the 19-g sampling catheter was 13.5% for the 3.0-mm (internal diameter) tube and 9.9% for the 3.5-mm endotracheal tube. These de-

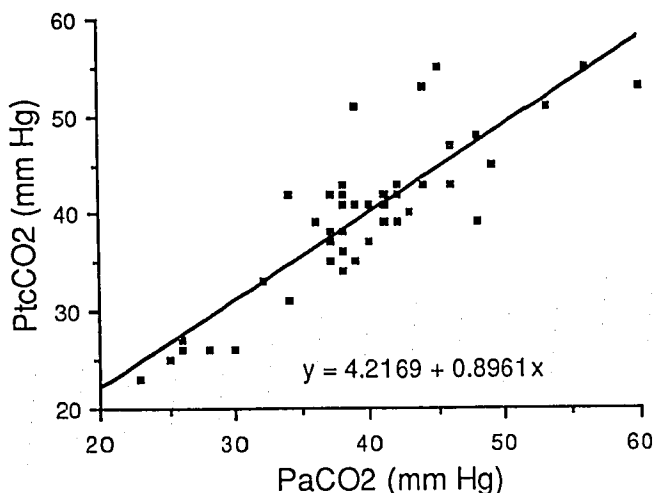

FIG. 4. Transcutaneous CO<sub>2</sub> accurately predicted PaCO<sub>2</sub> for all neonates ( $n = 46$ ) ( $r^2 = 0.76$ ).

TABLE 1. Comparison of  $P_{CO_2}$  Ratios

|                                                 | Number of Measurements | $P_{CO_2}$ Ratio |
|-------------------------------------------------|------------------------|------------------|
| PetCO <sub>2</sub> prox/PetCO <sub>2</sub> dist | 35                     | 0.65 ± 0.21      |
| PetCO <sub>2</sub> dist/ $P_{aCO_2}$            | 46                     | 0.79 ± 0.16†‡    |
| PetCO <sub>2</sub> dist*/ $P_{aCO_2}$           | 30                     | 0.88 ± 0.12†     |
| PtcCO <sub>2</sub> / $P_{aCO_2}$                | 46                     | 1.0 ± 0.10       |

Data are mean ± SD.

\* Excludes neonates with respiratory rates > 70/min or  $FI_{O_2}$  > 0.7.

†  $P < 0.001$  compared to PtcCO<sub>2</sub>/ $P_{aCO_2}$ .

‡  $P < 0.02$  compared to PetCO<sub>2</sub> dist\*/ $P_{aCO_2}$ .

creases in cross-sectional area did not significantly affect the mean (±SD) PtcO<sub>2</sub> before insertion of the catheter, 65 (±17) mmHg, compared to the mean value after insertion of the catheter, 68 (±15) mmHg, or the mean (±SD) PtcCO<sub>2</sub>, 40 (±8) mmHg both before and after insertion of the catheter. There were no complications from the presence of the sampling catheter within the endotracheal tube.

The total delay time of the sampling system was 0.85 s. This corresponds to a maximum respiratory rate of 70.5 breaths per minute for accurate PetCO<sub>2</sub> measurements.

## DISCUSSION

Non-invasive end-tidal gas monitoring has become increasingly important in the perioperative management of all patients, and, in particular, the critically ill neonate. However, the usefulness of this monitor is limited by several factors, including its accuracy in infants ≤ 12 kg. The results of this study demonstrate that, in critically ill neonates, distal PetCO<sub>2</sub> measurements more accurately approximate  $P_{aCO_2}$  than do proximal PetCO<sub>2</sub> measurements. Furthermore, distal PetCO<sub>2</sub> measurements are significantly greater than proximal measurements (fig. 2; table 1). This latter discrepancy between distal and proximal end-tidal measurements may be attributed, in part, to the position of the catheter within the endotracheal tube and breathing circuit. That is, the mixing of end-tidal and fresh gases is less at the distal end of the endotracheal tube than at the proximal end. The extent of this mixing is determined, in part, by the gas flows used. Although the sampling flow rate of the capnometer (150 ml/min) is large compared to the minute volume of the neonate (250–400 ml · kg<sup>-1</sup> · min<sup>-1</sup>),<sup>8</sup> it is small compared to the fresh gas flow (5–6 l/min) used with these infant ventilators. Thus, the increased accuracy of distal compared to proximal PetCO<sub>2</sub> measurements may be attributed, in part, to a decrease in the dilution of end-tidal gas by fresh gas.

The total delay time (TDT) in the present study (0.85 s) is slightly longer than expected according to the manufacturer's specifications, which predict accurate measurements of  $p_{CO_2}$  up to 75 breaths per minute.\*\* We attributed the increase in TDT in our system to the addition of the endotracheal sampling catheter.<sup>9</sup> It is for this reason that a maximum respiratory rate of 70 breaths per minute was used.

Although multiple measurements were obtained in ten neonates, we do not feel that this invalidates our results. Studies were repeated only when an improvement or deterioration in gas exchange occurred and changes in ventilation or inspired oxygen were made. Six of these neonates appear in both the <70 and the >70 breaths per minute groups. Since these changes tended to occur in sicker neonates, the inclusion of multiple measurements actually biases our data towards a poorer correlation.

An alveolar plateau may be necessary for accurate end-tidal capnometry. Studies have documented a significant correlation between PetCO<sub>2</sub> and  $P_{aCO_2}$  in healthy neonates when an alveolar plateau is obtained.<sup>10</sup> We found an excellent correlation between distal PetCO<sub>2</sub> and  $P_{aCO_2}$ , despite the fact that an alveolar plateau was not present in every instance. Several factors may account for our failure to achieve an alveolar plateau: 1) the rapid respiratory rate, 2) the presence of respiratory disease, and 3) unfavorable characteristics of the capnometer (high gas sampling flow rate and slow response time).<sup>10</sup> Despite the lack of a plateau during expiration, distal PetCO<sub>2</sub> accurately estimates  $P_{aCO_2}$  in critically ill neonates whose respiratory rates are less than 70/min and in whom the lung disease is not severe ( $FI_{O_2} < 0.7$ ).

PetCO<sub>2</sub> measurements facilitate calculation of the arterial-end-tidal (a-et)  $P_{CO_2}$  differences, a measure of ventilation/perfusion mismatch.<sup>8</sup> Serial (a-et)  $P_{CO_2}$  differences have been used to follow the course and response during the treatment of respiratory distress syndrome,<sup>11</sup> to assess lung function, and to estimate pulmonary blood flow during anesthesia.<sup>12</sup> In the present study, the a-et distal  $P_{CO_2}$  differences in neonates with minimal lung disease ( $FI_{O_2} < 0.3$ ) compared favorably with CO<sub>2</sub> differences for healthy term infants (–2 to 4 mmHg).<sup>9,13</sup> Hence, distal PetCO<sub>2</sub> measurements can be used in the calculation of a-et  $P_{CO_2}$  differences in neonates.

PtcCO<sub>2</sub> measurements are used extensively in neonatal intensive care units to monitor changes in  $P_{aCO_2}$ .

\*\* Puritan-Bennett Corporation CO<sub>2</sub> monitor and recorder operating instructions.

Although  $P_{tc}CO_2$  is an accurate estimate of  $P_{a}CO_2$  (fig. 4),  $P_{tc}CO_2$  monitoring during anesthesia is sometimes impractical. Factors that limit its intraoperative use include the relatively long calibration and stabilization periods, the need to change the sensor site every 2–4 h, and the difficulty in finding a site for the sensor away from the surgical field in the small premature neonate who requires numerous monitors. In the intensive care unit,  $P_{tc}CO_2$  is more commonly used because it is accurate during the acute phase of respiratory disease. However,  $P_{et}CO_2$  remains an alternative site of monitoring in those neonates with less severe disease.

In conclusion, we found that, in the critically ill neonate with mild to moderate lung disease, both distal  $P_{et}CO_2$  and  $P_{tc}CO_2$  more accurately approximate  $P_{a}CO_2$  than proximal  $P_{et}CO_2$ . However, in the neonate with severe lung disease,  $P_{tc}CO_2$  is the more accurate estimate of  $P_{a}CO_2$ .

The authors wish to thank Mr. George Volgyesi, P.Eng., for his technical advice and assistance, and Ms. Terri Cain and Ms. S. L. Loo for their assistance in preparing this manuscript.

#### REFERENCES

1. Hansen TN, Tooley WH: Skin surface carbon dioxide tension in sick infants. *Pediatrics* 64:942–945, 1979
2. Fisher DM, Swedlow DB: Estimating  $P_{a}CO_2$  by end-tidal gas sampling in children. *Crit Care Med* 9:287A, 1981
3. Eberhard P, Mindt TW, Schafer R: Methodologic aspects of cutaneous  $pCO_2$  monitoring. *Intensive Care Med* 7:249–250, 1981
4. Meny RG, Bhat AM, Aranas E: Mass spectrometer monitoring of expired carbon dioxide in critically ill neonates. *Crit Care Med* 13:1064–1066, 1985
5. Schieber RA, Namnoum A, Sugden A, Saville AL, Orr RA: Accuracy of expiratory carbon dioxide measurements using the coaxial and circle breathing circuits in small subjects. *J Clin Mon* 1:149–155, 1985
6. Epstein MF, Cohen AR, Feldman HA, Raemer DB: Estimation of  $P_{a}CO_2$  by two noninvasive methods in the critically ill newborn infant. *J Pediatr* 106:282–286, 1985
7. Badgwell JM, McLeod ME, Lerman J, Creighton RE: End-tidal  $PCO_2$  measurements sampled at the distal and proximal ends of the endotracheal tube in infants and children. *Anesth Analg* 66:959–964, 1987
8. Chu J, Clements JA, Cotton EK, Klaus MH, Sweet AY, Tooley WH: Neonatal pulmonary ischaemia. Part I: Clinical and physiological studies. *Pediatrics* 40:709–782, 1967
9. Schena J, Thompson J, Crone RK: Mechanical influences on the capnogram. *Crit Care Med* 12:672–674, 1984
10. Dumpit FM, Brady JP: A simple technique for measuring alveolar  $CO_2$  in infants. *J Appl Physiol* 45:648–650, 1978
11. McCann EM, Lewis K, Deming DD, Donovan MJ, Brady JP: Controlled trial of furosemide therapy in infants with chronic lung disease. *J Pediatr* 106:957–962, 1985
12. Morton WD: Three-breath determination of cardiac output in infants and children (abstract). *ANESTHESIOLOGY* 67:A486, 1987
13. McCann EM, Goldman SL, Brady JP: Pulmonary function in the sick newborn infant. *Pediatr Res* 21:313–325, 1987

Anesthesiology  
69:116–119, 1988

## Anesthesia for Cerebral Aneurysm Surgery: Use of Induced Hypertension in Patients with Symptomatic Vasospasm

MARK R. BUCKLAND, M.B., B.S., F.F.A.R.A.C.S.,\* H. HUNT BATJER, M.D.,† A. H. GIESECKE, M.D.‡

There are approximately 25,000 cases per year of aneurysmal subarachnoid hemorrhage (SAH) in the United States. Despite modern neurosurgical and neu-

roanesthetic techniques, the outlook for patients suffering SAH remains bleak. Twenty percent of these patients die before reaching hospital, and another 30% die in the ensuing days and weeks.<sup>1</sup> About 80% of patients admitted to neurosurgical centers in the recent Cooperative Aneurysm Study were initially in good condition, but only 56% had favorable outcomes, despite current medical therapy.<sup>2</sup> Symptomatic vasospasm was the most common cause of death and disability for patients surviving the initial hemorrhage and reaching neurosurgical care.<sup>3</sup>

Angiographic vasospasm occurs in 40–70% of patients presenting for treatment.<sup>3</sup> Clinical vasospasm, the syndrome of ischemic consequences of cerebral arterial narrowing, parallels the time course for that of angiographic vasospasm, but only produces ischemic symp-

\* Visiting Assistant Professor, Department of Anesthesiology.

† Assistant Professor, Department of Surgery, Division of Neurological Surgery.

‡ Professor and Chairman, Department of Anesthesiology.

Received from the Department of Anesthesiology and the Department of Surgery, Division of Neurological Surgery, University of Texas Health Science Center at Dallas, Dallas, Texas. Accepted for publication January 26, 1988.

Address reprint requests to Dr. Batjer: Division of Neurological Surgery, University of Texas, 5323 Harry Hines Boulevard, Dallas, Texas 75235.

Key words: Anesthesia; neurosurgical. Anesthetic technique: hypertension; induced.
